# Supplementary material for: Construction of durable superhydrophobic and anti-icing coatings via incorporating boroxine cross-linked silicone elastomers with good self-healability
Source: Royal Society of Chemistry journal article supplement (doi:10.1039/d2sm01106a), 2022-01-01
Supplement: d2sm01106a1.pdf [file d2sm01106a1.pdf]

**Supporting Information to:**

## **Construction of durable superhydrophobic and anti-icing coating via incorporating boroxine cross-linked silicone elastomers with good self-healability**

Hengfei Liang,<sup>a,b</sup> Qi Kuang,<sup>b</sup> Chengyao Hu,<sup>b</sup> Jun Chen,<sup>c</sup> Xiaohui Lu,<sup>c</sup> Yawen Huang,<sup>a</sup> Hui Yan<sup>c</sup>

<sup>a</sup> State Key Laboratory of Environmental-friendly Energy Materials, Southwest University of Science and Technology, Mianyang 621010, China. E-mail: huangyawenswust@163.com

<sup>b</sup> School of Material Science and Engineering, Southwest University of Science and Technology, Mianyang, Sichuan 621010, China.

<sup>c</sup> Mianyang Maxwell Technology Co.,Ltd., Mianyang 621010, China.

**Fig. S1** (a) BFVSE immersed in water for 24 hours; (b) BFVSE swelled in THF; (c) BFVSE dissolved in THF+H<sub>2</sub>O.

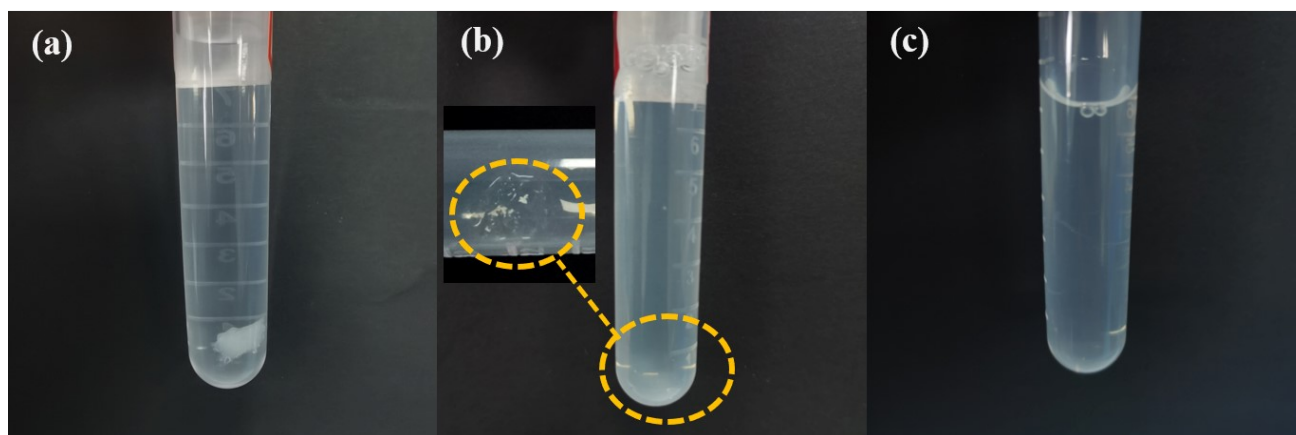

**Fig. S2** TGA curves of VS, BVSE and BFVSE, in which VS was obtained by conventional covalent cross-linking.

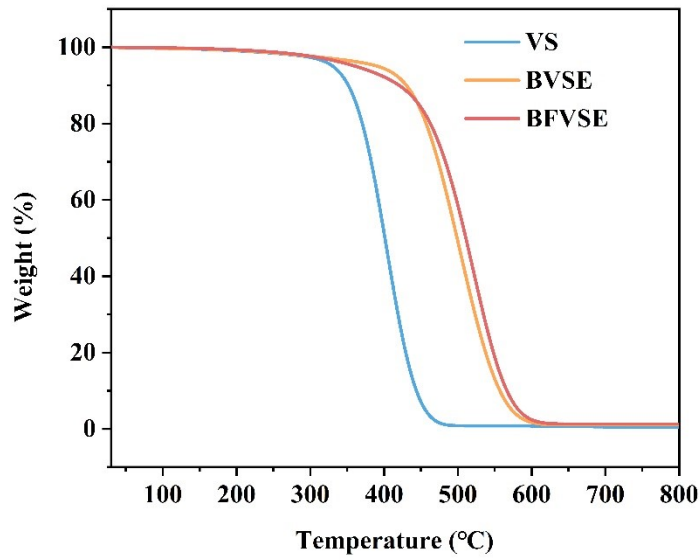

**Fig. S3** Rheological behavior curves at 25 °C. (a) Strain sweep curves, variation of (b)  $G'$  and (c)  $G''$  with angular frequency of VS, BVSE, BFVSE for different TVB/monomer ratios.

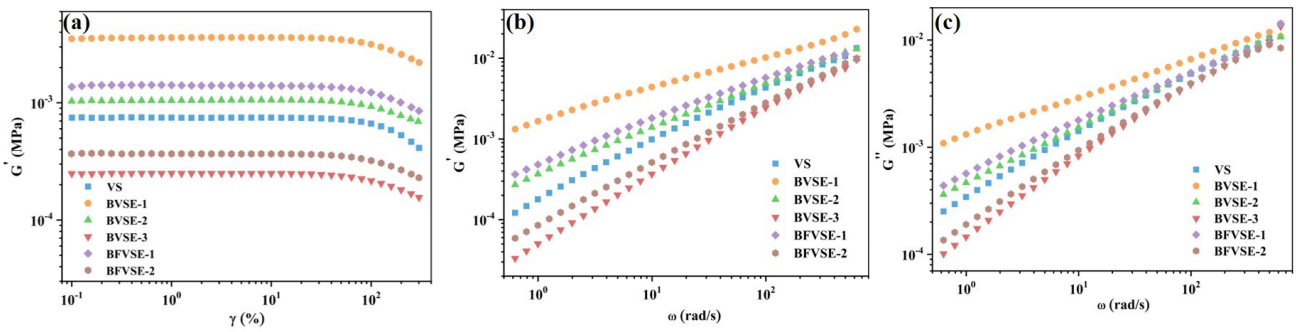

**Table S1** Effects of different  $\text{SiO}_2$  and BFVSE contents on anti-icing properties of coatings.

| Samples                       | Delayed freezing | Ice adhesion strength | CA (°) |
|-------------------------------|------------------|-----------------------|--------|
|                               | time (s)         | (kPa)                 |        |
| EP/ $\text{SiO}_2$ -1/BFVSE-1 | 1620             | 75                    | 158    |
| EP/ $\text{SiO}_2$ -2/BFVSE-1 | 2527             | 73                    | 158    |
| EP/ $\text{SiO}_2$ -3/BFVSE-1 | 2671             | 77                    | 159    |
| EP/ $\text{SiO}_2$ -2/BFVSE-2 | 1116             | 64                    | 130    |
| EP/ $\text{SiO}_2$ -2/BFVSE-3 | 874              | 53                    | 114    |
